# Supplementary material for: Unbiased homeologous recombination during pneumococcal transformation allows for multiple chromosomal integration events
Source: eLife journal article supplement (doi:10.7554/elife.58771), 2020-09-23

# Figure 2—figure supplement 2

D39V; *comGA::comGA-msfYFP*

*comGA-GG::*

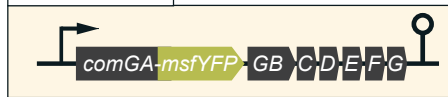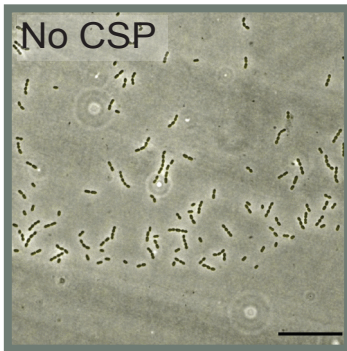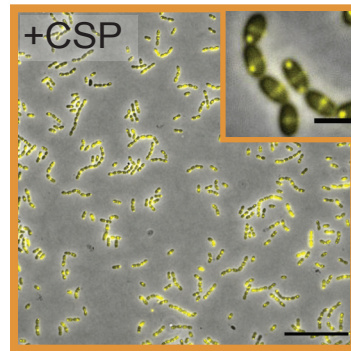

D39V; *dprA::dprA-msfYFP*

*dprA::*

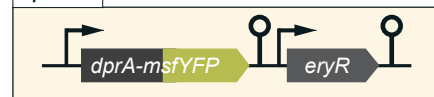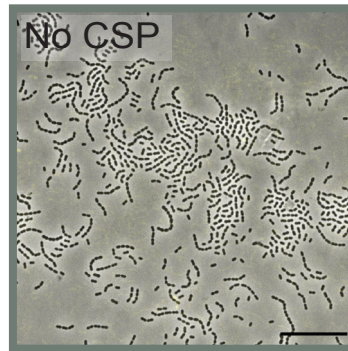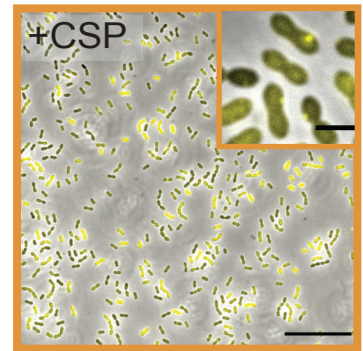

D39V; *comEA::msfYFP-comEA*

*comEA/EC::*

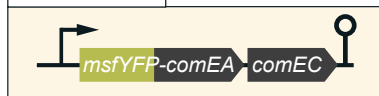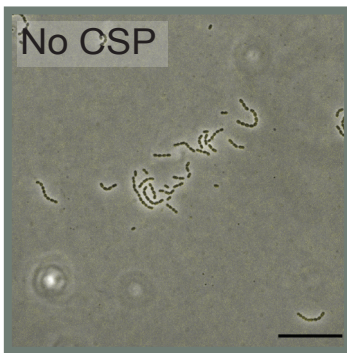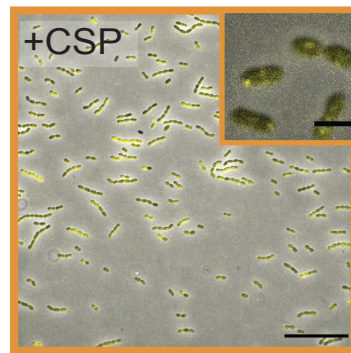

D39V; *recA::recA-mCherry*

*cinA/recA/dinF/lytA::*

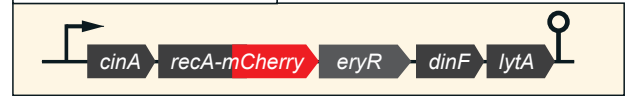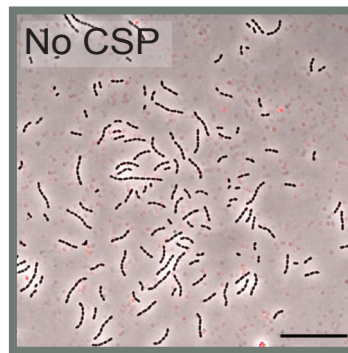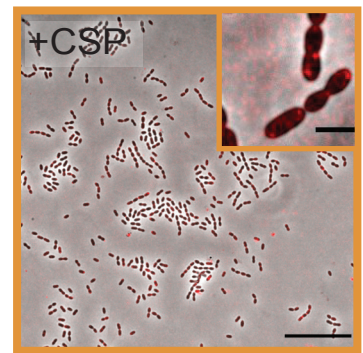

D39V; *comFA::comFA-msfYFP*

*comFA/FC::*

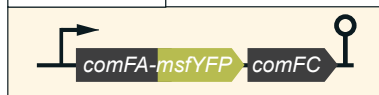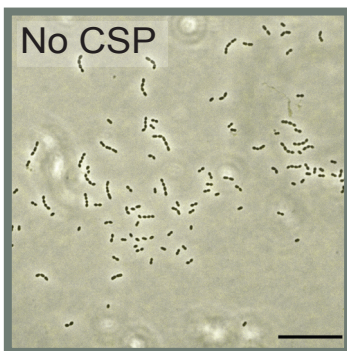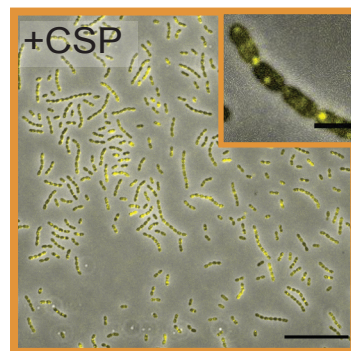

Supplement: supp [file elife-58771-supp-v1.zip › elife_poa_e58771_Figure_2_figure_supplement_2.pdf]
