# Supplementary material for: Unbiased homeologous recombination during pneumococcal transformation allows for multiple chromosomal integration events
Source: eLife journal article supplement (doi:10.7554/elife.58771), 2020-09-23
Supplement: supp [file elife-58771-supp-v1.zip]

Archive with 22 entries (22 files):
- elife_poa_e58771_Figure_2_figure_supplement_1.pdf
- elife_poa_e58771_Figure_2_figure_supplement_2.pdf
- elife_poa_e58771_Figure_3_figure_supplement_1.pdf
- elife_poa_e58771_Figure_3_figure_supplement_2.pdf
- elife_poa_e58771_Figure_3_figure_supplement_3.pdf
- elife_poa_e58771_Figure_3_figure_supplement_4.pdf
- elife_poa_e58771_Figure_4_figure_supplement_1.pdf
- elife_poa_e58771_Figure_4_figure_supplement_2.pdf
- elife_poa_e58771_Figure_4_figure_supplement_3.pdf
- elife_poa_e58771_Figure_5_figure_supplement_1.pdf
- elife_poa_e58771_Figure_5_figure_supplement_2.pdf
- elife_poa_e58771_Figure_6_figure_supplement_1.pdf
- elife_poa_e58771_Supplementary_file_1.xlsx
- elife_poa_e58771_Supplementary_file_2.xlsx
- elife_poa_e58771_Video_1.mp4
- elife_poa_e58771_Video_2.mp4
- elife_poa_e58771_Video_3.mp4
- elife_poa_e58771_Video_4.mp4
- elife_poa_e58771_Video_5.mp4
- elife_poa_e58771_Video_6.mp4
- elife_poa_e58771_Video_7.mp4
- elife_poa_e58771_Transparent_Reporting_File.pdf
