# Supplementary material for: Unbiased homeologous recombination during pneumococcal transformation allows for multiple chromosomal integration events
Source: eLife journal article supplement (doi:10.7554/elife.58771), 2020-09-23

**A**

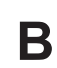

**Genotype:**  
Heteroduplex

**Phenotype:**  
Transcripts from **tDNA** allele

**Genotype:**  
Original homoduplex

**Phenotype:**  
Transcripts from both **tDNA** and original allele

**Genotype:**  
**tDNA** homoduplex

**Phenotype:**  
Transcripts from **tDNA** allele

The diagram illustrates a genetic cross between a heteroduplex cell (top) and a tDNA homoduplex cell (middle). The heteroduplex cell contains one original allele (black) and one tDNA allele (orange). The tDNA homoduplex cell contains two tDNA alleles (orange). The cross results in four possible genotypes in the offspring: two cells with the original homoduplex genotype (black and grey) and two cells with the tDNA homoduplex genotype (orange). The phenotypes are determined by the presence of tDNA alleles, which produce transcripts from the tDNA allele.

C

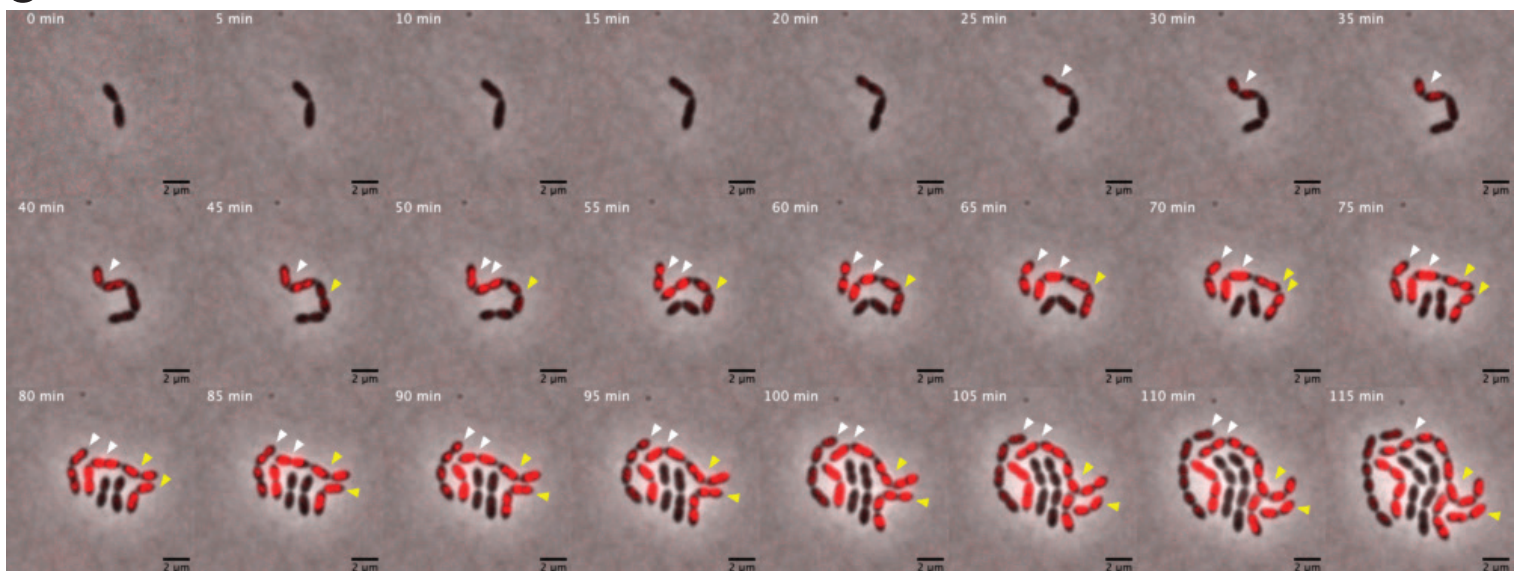

Supplement: supp [file elife-58771-supp-v1.zip › elife_poa_e58771_Figure_5_figure_supplement_2.pdf]
