# Supplementary figures and images for: Unbiased homeologous recombination during pneumococcal transformation allows for multiple chromosomal integration events
Source: eLife journal article supplement (doi:10.7554/elife.58771), 2020-09-23

# Figure 2—figure supplement 1

**a**

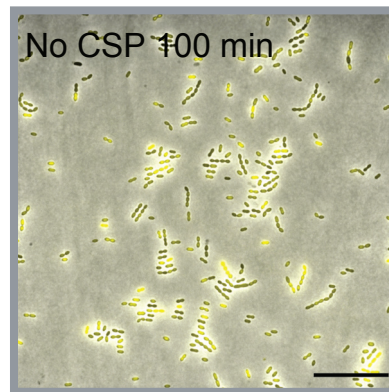

**b**

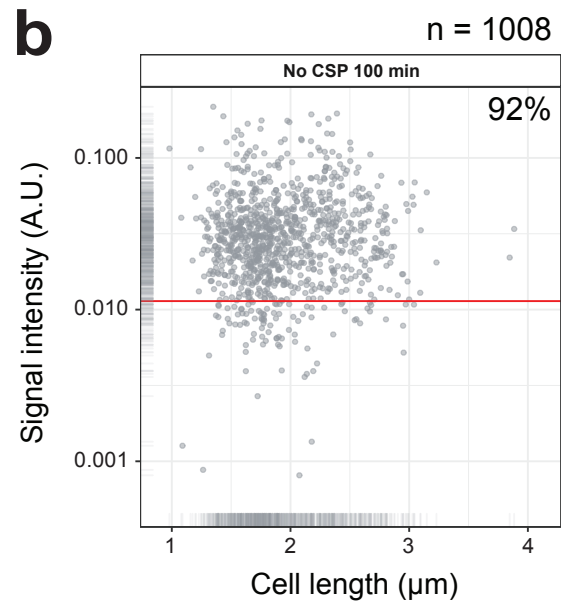

Supplement: supp [file elife-58771-supp-v1.zip › elife_poa_e58771_Figure_2_figure_supplement_1.pdf]

# Figure 3–figure supplement 1

**a**

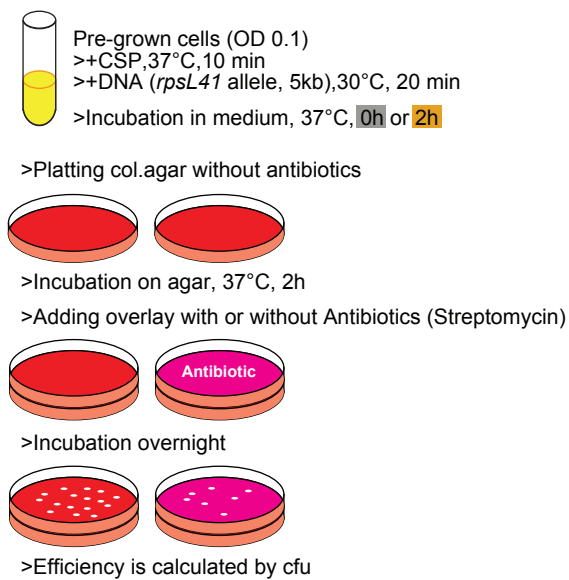

**b**

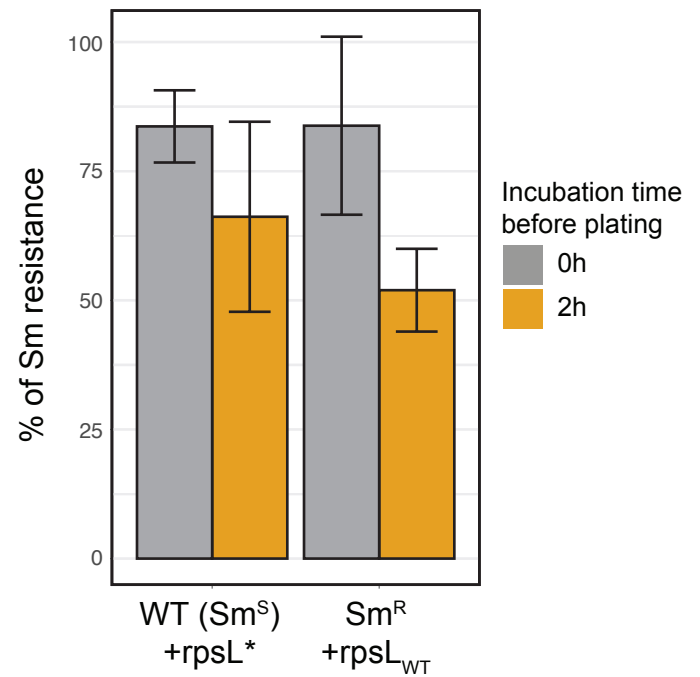

Supplement: supp [file elife-58771-supp-v1.zip › elife_poa_e58771_Figure_3_figure_supplement_1.pdf]

# Figure 3–figure supplement 2

A

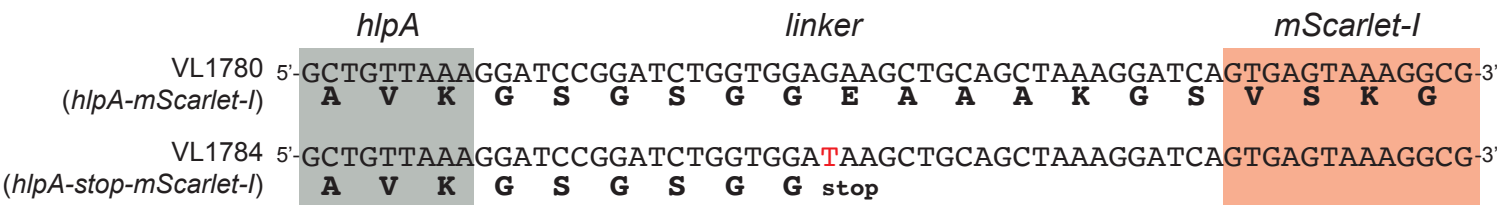

B

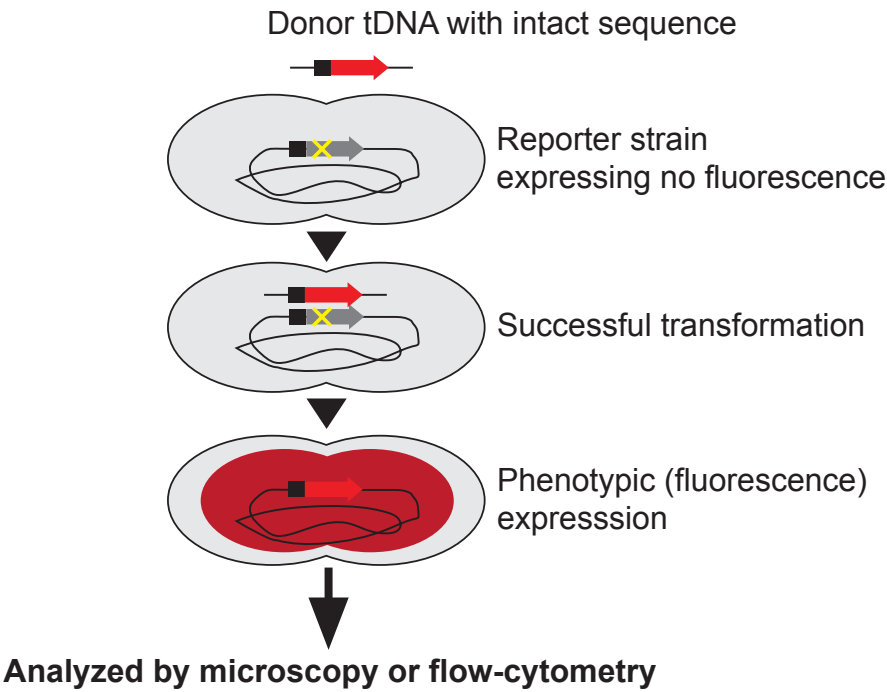

Supplement: supp [file elife-58771-supp-v1.zip › elife_poa_e58771_Figure_3_figure_supplement_2.pdf]

Figure 3—figure supplement 3

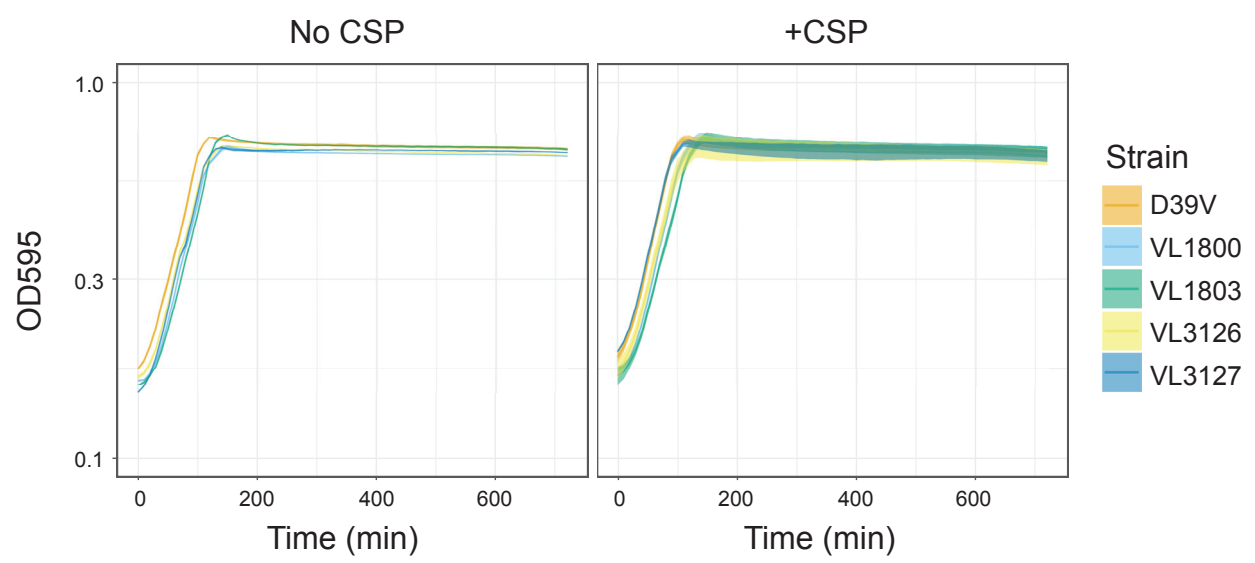

Supplement: supp [file elife-58771-supp-v1.zip › elife_poa_e58771_Figure_3_figure_supplement_3.pdf]

# Figure 3—figure supplement 4

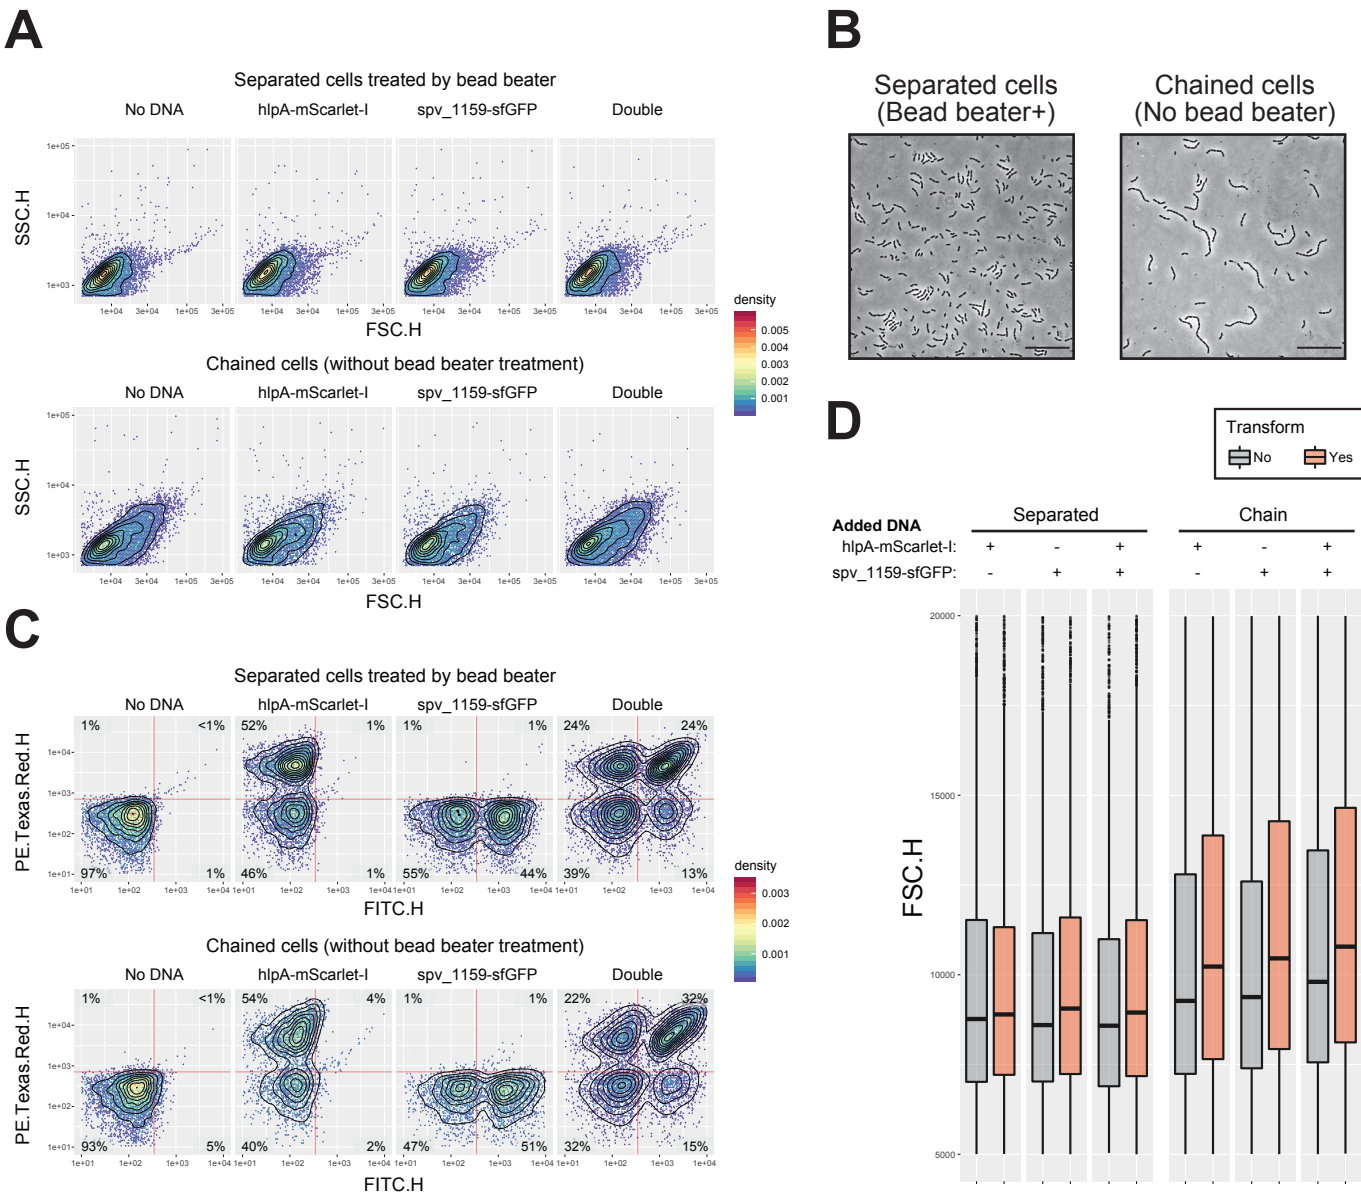

Supplement: supp [file elife-58771-supp-v1.zip › elife_poa_e58771_Figure_3_figure_supplement_4.pdf]

# Figure 4—figure supplement 1

A

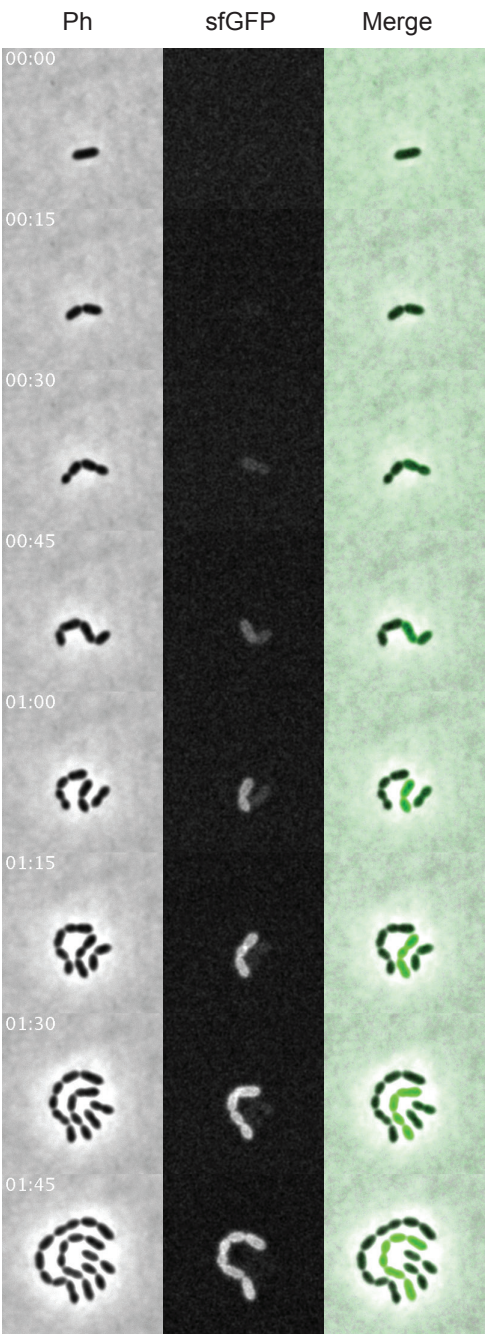

B

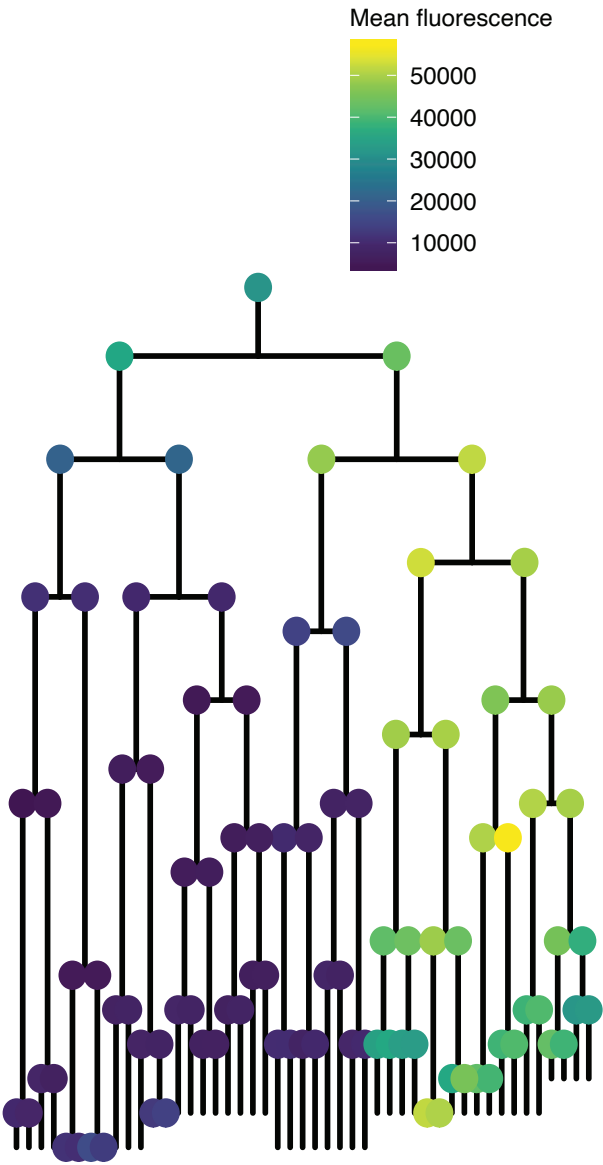

Supplement: supp [file elife-58771-supp-v1.zip › elife_poa_e58771_Figure_4_figure_supplement_1.pdf]

Figure 4—figure supplement 2

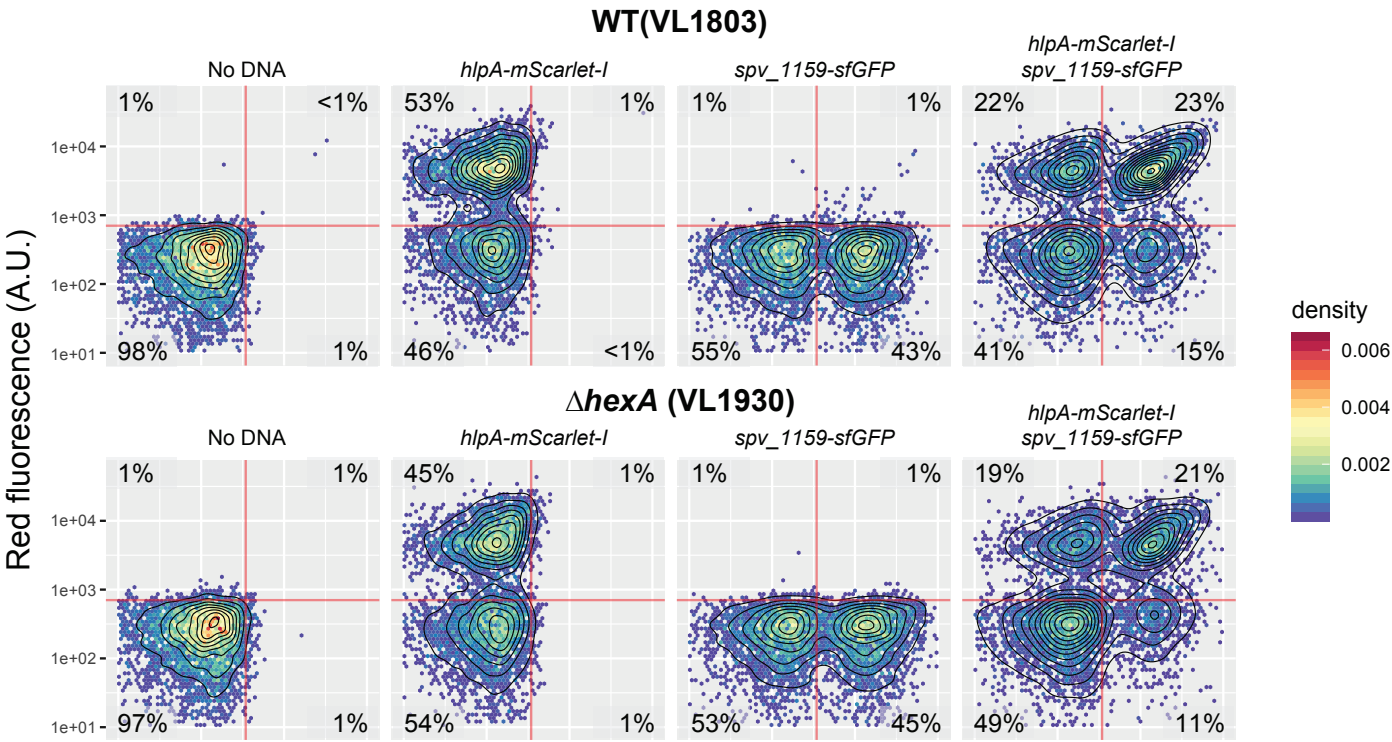

Supplement: supp [file elife-58771-supp-v1.zip › elife_poa_e58771_Figure_4_figure_supplement_2.pdf]

## Figure 4—figure supplement 3

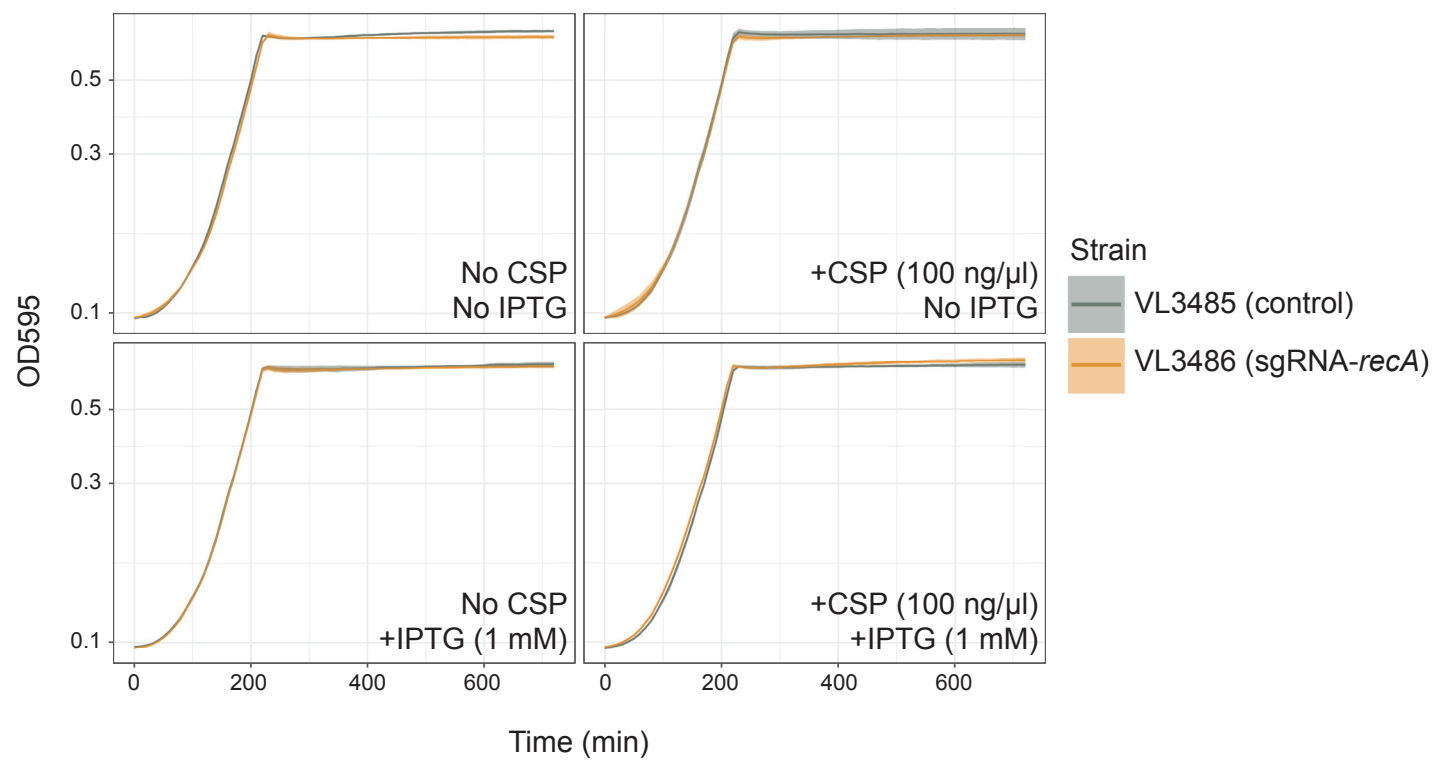

Supplement: supp [file elife-58771-supp-v1.zip › elife_poa_e58771_Figure_4_figure_supplement_3.pdf]

# Figure 5—figure supplement 1

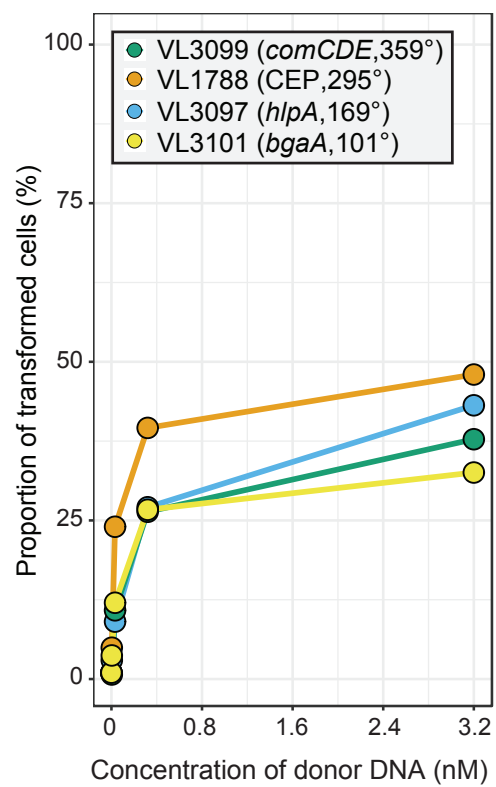

Supplement: supp [file elife-58771-supp-v1.zip › elife_poa_e58771_Figure_5_figure_supplement_1.pdf]

Figure 6—figure supplement 1

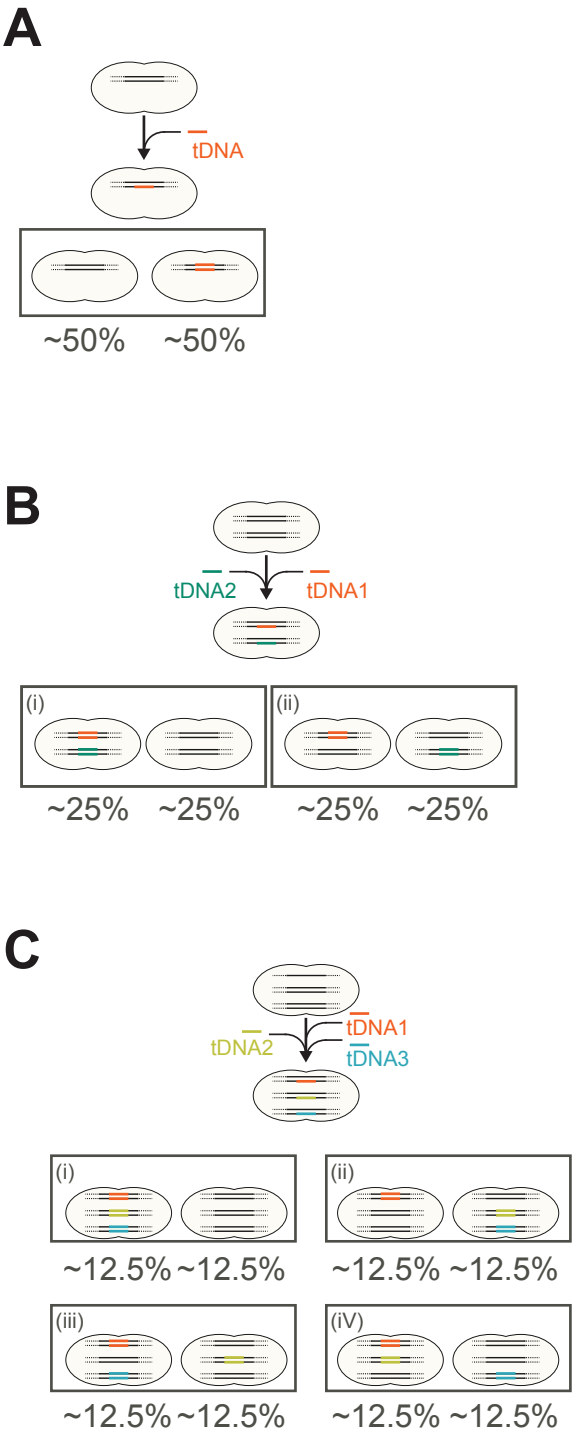

Supplement: supp [file elife-58771-supp-v1.zip › elife_poa_e58771_Figure_6_figure_supplement_1.pdf]
